# Supplementary material for: PbMSeO6 (M = Mo and W): New quaternary mixed metal selenites with asymmetric cationic coordination environments
Source: Royal Society of Chemistry journal article supplement (doi:10.1039/c2dt11977c), 2012-01-01

Electronic Supplementary Information (ESI) for:

**PbMSeO<sub>6</sub>** (M = Mo and W): New quaternary mixed  
metal **selenites** with asymmetric cationic coordination  
**environments**

*Seung-Jin Oh, Dong Woo Lee, and Kang Min Ok\**

Department of Chemistry, Chung-Ang University, 221 Heukseok-dong, Dongjak-gu, Seoul 156-756,  
Republic of Korea

- S1. Experimental and calculated powder X-ray diffraction patterns for **PbMoSeO<sub>6</sub>**
- S2. Final Rietveld plot of **PbWSeO<sub>6</sub>**
- S3. Atomic positions and isotropic displacement parameters for **PbWSeO<sub>6</sub>**
- S4. Thermogravimetric analysis diagram for **PbMoSeO<sub>6</sub>** and XRD pattern for calcined product
- S5. Thermogravimetric analysis diagram for **PbWSeO<sub>6</sub>** and XRD pattern for calcined product
- S6. IR spectrum for **PbMoSeO<sub>6</sub>**
- S7. IR spectrum for **PbWSeO<sub>6</sub>**

S1. Experimental and calculated powder X-ray diffraction patterns for  $\text{PbMoSeO}_6$

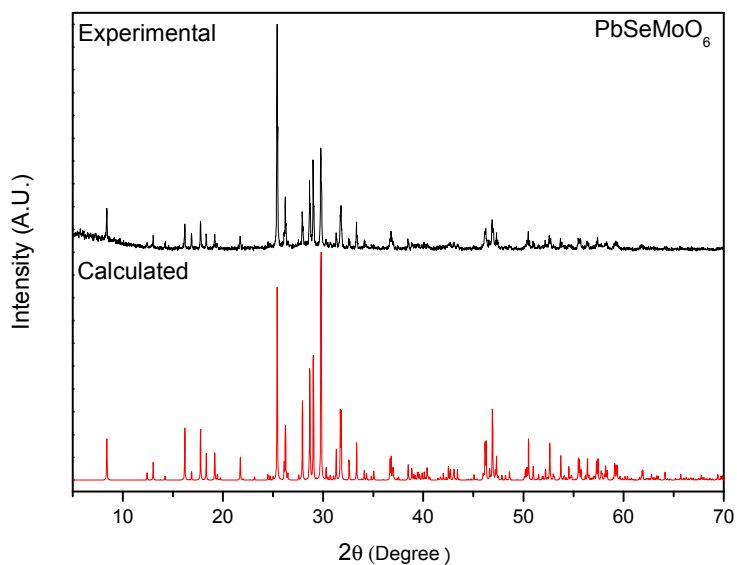

S2. Final Rietveld plot of  $\text{PbWSeO}_6$

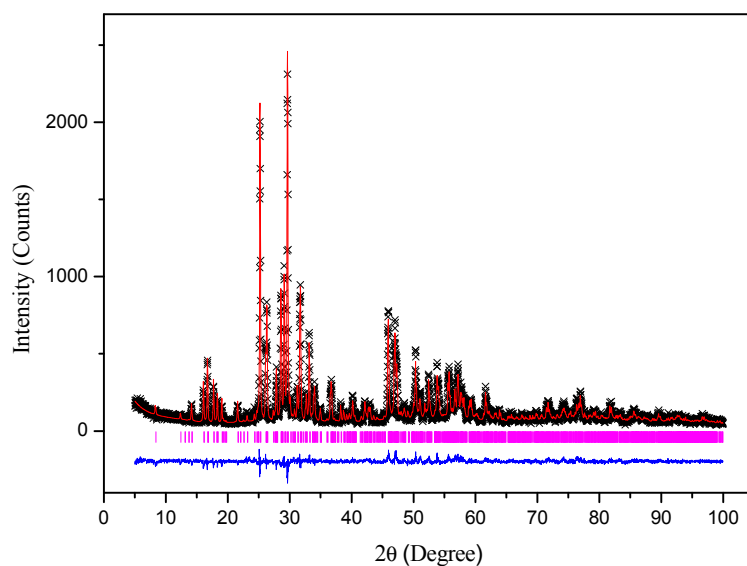

The calculated pattern (red solid line) is compared with observed data ( $\times$ ). The locations of reflections are indicated by the magenta vertical bars. The difference between the observed and calculated profiles is shown at the bottom (blue solid line).

### S3. Atomic positions and isotropic displacement parameters for PbWSeO<sub>6</sub>

| Atom  | <i>x</i>   | <i>y</i>   | <i>z</i>   | <i>U</i> <sub>iso</sub> (Å <sup>2</sup> ) |
|-------|------------|------------|------------|-------------------------------------------|
| Pb(1) | 0.2451(9)  | 0.1375(11) | 0.4936(5)  | 0.0238(2)                                 |
| Pb(2) | 0.3524(8)  | 0.2896(12) | 0.1571(5)  | 0.0246(2)                                 |
| W(1)  | 0.8396(9)  | 0.0473(11) | 0.1985(6)  | 0.0224(2)                                 |
| W(2)  | 0.8398(9)  | 0.5512(11) | 0.2031(6)  | 0.0232(2)                                 |
| Se(1) | 0.712(2)   | 0.365(3)   | 0.4696(11) | 0.0204(3)                                 |
| Se(2) | 0.3794(19) | 0.810(3)   | 0.2145(12) | 0.0223(3)                                 |
| O(1)  | 0.828(9)   | -0.044(10) | 0.035(6)   | 0.02 <sup>a</sup>                         |
| O(2)  | 1.115(9)   | 0.107(10)  | 0.244(6)   | 0.02 <sup>a</sup>                         |
| O(3)  | 0.872(10)  | -0.174(11) | 0.273(5)   | 0.02 <sup>a</sup>                         |
| O(4)  | 0.746(10)  | 0.296(14)  | 0.175(6)   | 0.02 <sup>a</sup>                         |
| O(5)  | 0.807(10)  | 0.159(10)  | 0.404(5)   | 0.02 <sup>a</sup>                         |
| O(6)  | 0.515(10)  | 0.974(10)  | 0.174(6)   | 0.02 <sup>a</sup>                         |
| O(7)  | 0.822(9)   | 0.571(10)  | 0.042(5)   | 0.02 <sup>a</sup>                         |
| O(8)  | 1.101(10)  | 0.494(9)   | 0.249(6)   | 0.02 <sup>a</sup>                         |
| O(9)  | 0.794(10)  | 0.527(9)   | 0.404(5)   | 0.02 <sup>a</sup>                         |
| O(10) | 0.524(10)  | 0.607(9)   | 0.183(5)   | 0.02 <sup>a</sup>                         |
| O(11) | 0.471(9)   | 0.336(12)  | 0.399(6)   | 0.02 <sup>a</sup>                         |
| O(12) | 0.425(10)  | 0.857(11)  | 0.378(5)   | 0.02 <sup>a</sup>                         |

<sup>a</sup> Displacement parameters constrained to be equal.

S4. Thermogravimetric analysis diagram for  $\text{PbMoSeO}_6$  and XRD pattern for calcined product

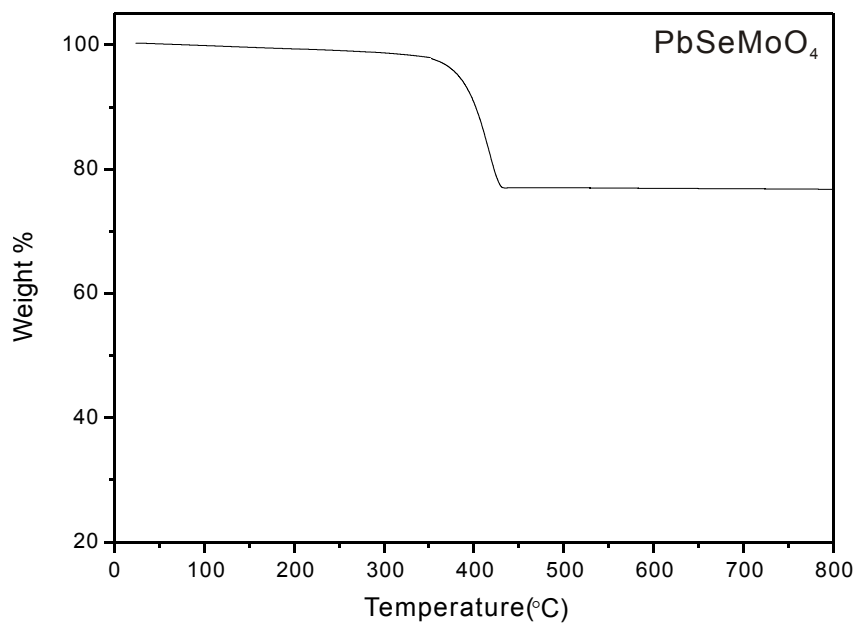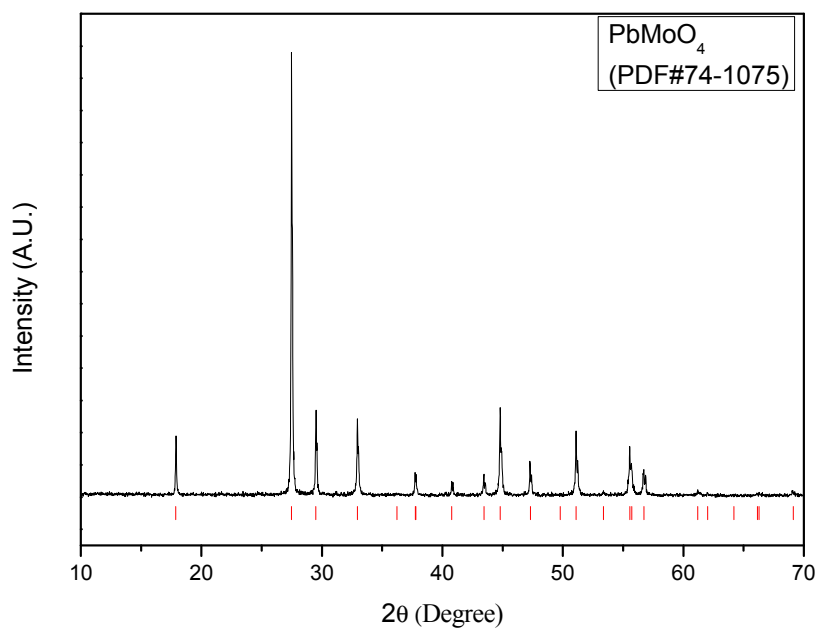

S5. Thermogravimetric analysis diagram for  $\text{PbWSeO}_6$  and XRD pattern for calcined product

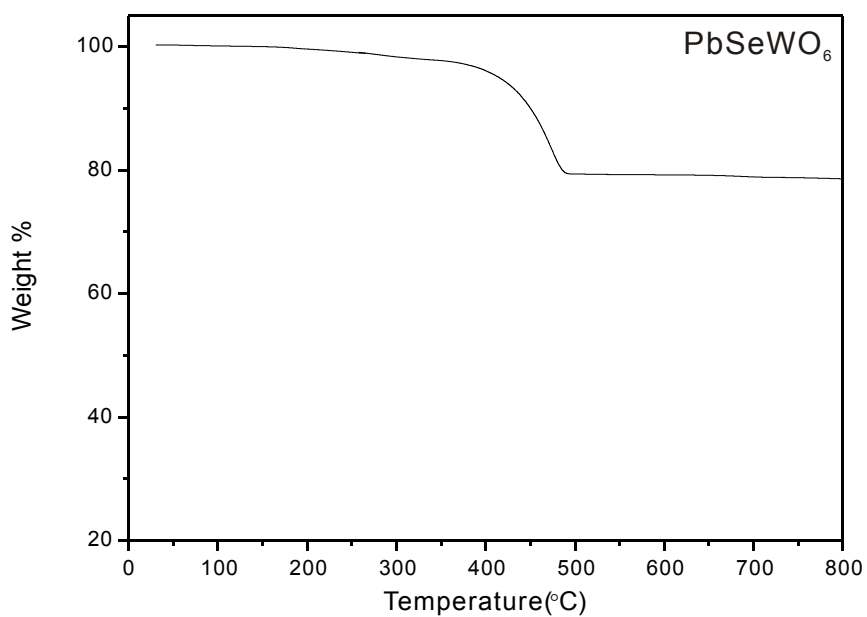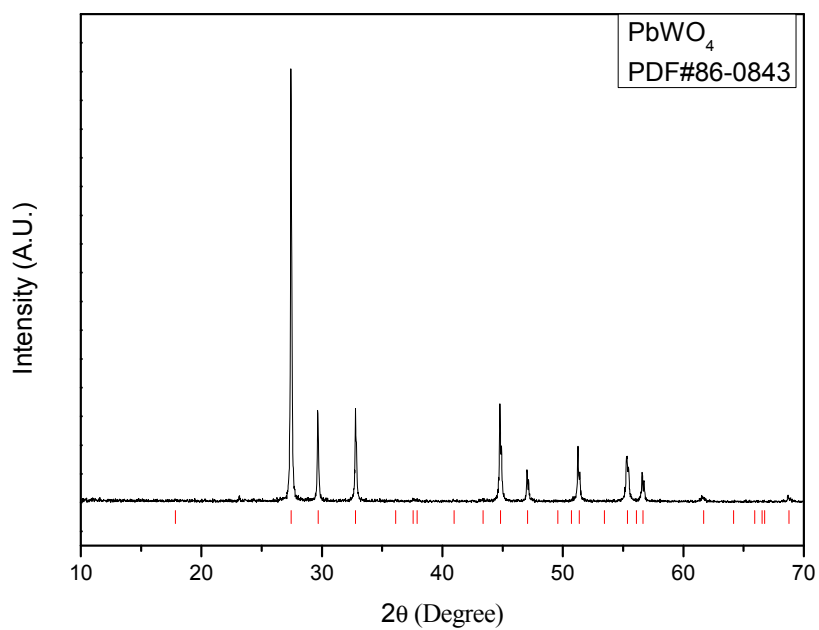

S6. IR spectrum for  $\text{PbMoSeO}_6$

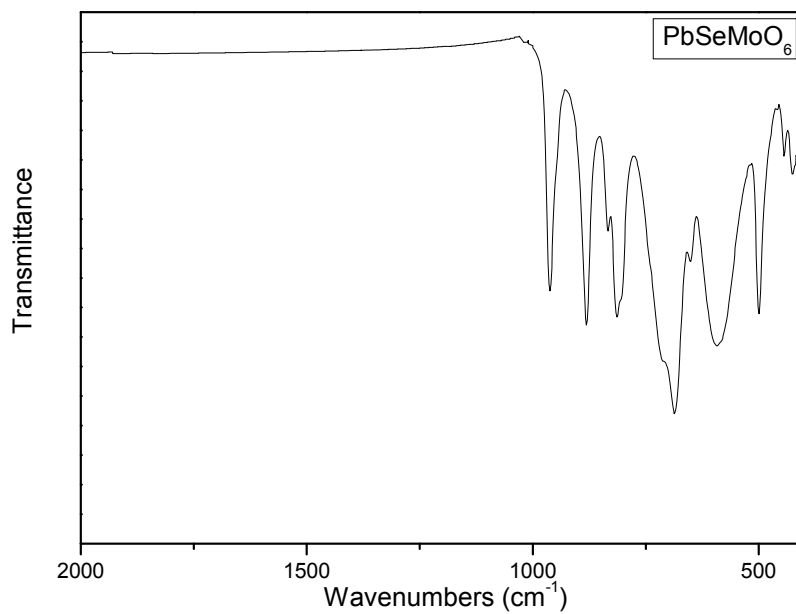

S7. IR spectrum for  $\text{PbWSeO}_6$

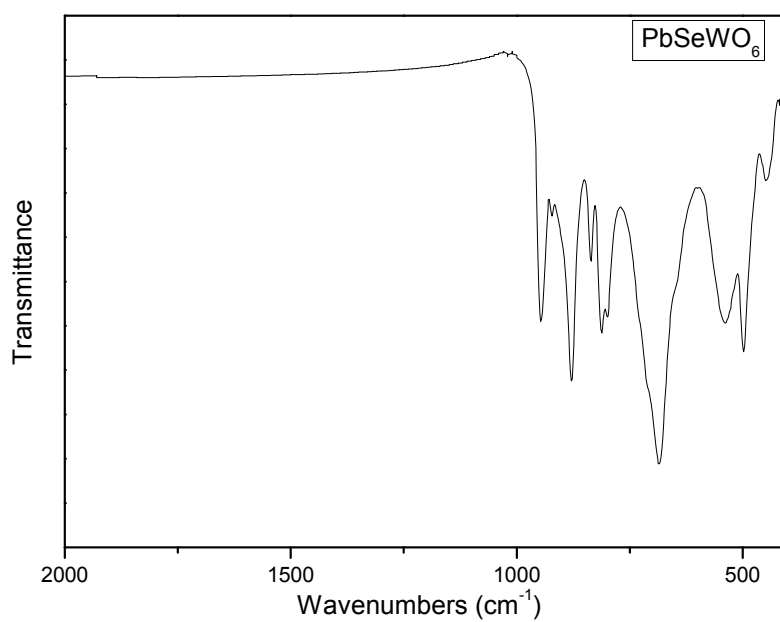

Supplement: c2dt11977c.pdf [file c2dt11977c.pdf]
